# Supplementary material
Source: Springer Nature journal article supplement (https://www.springermedizin.de/resource/supplementary/13058_2014_3449_MOESM2_ESM.pdf/9704048)

**Figure 2**

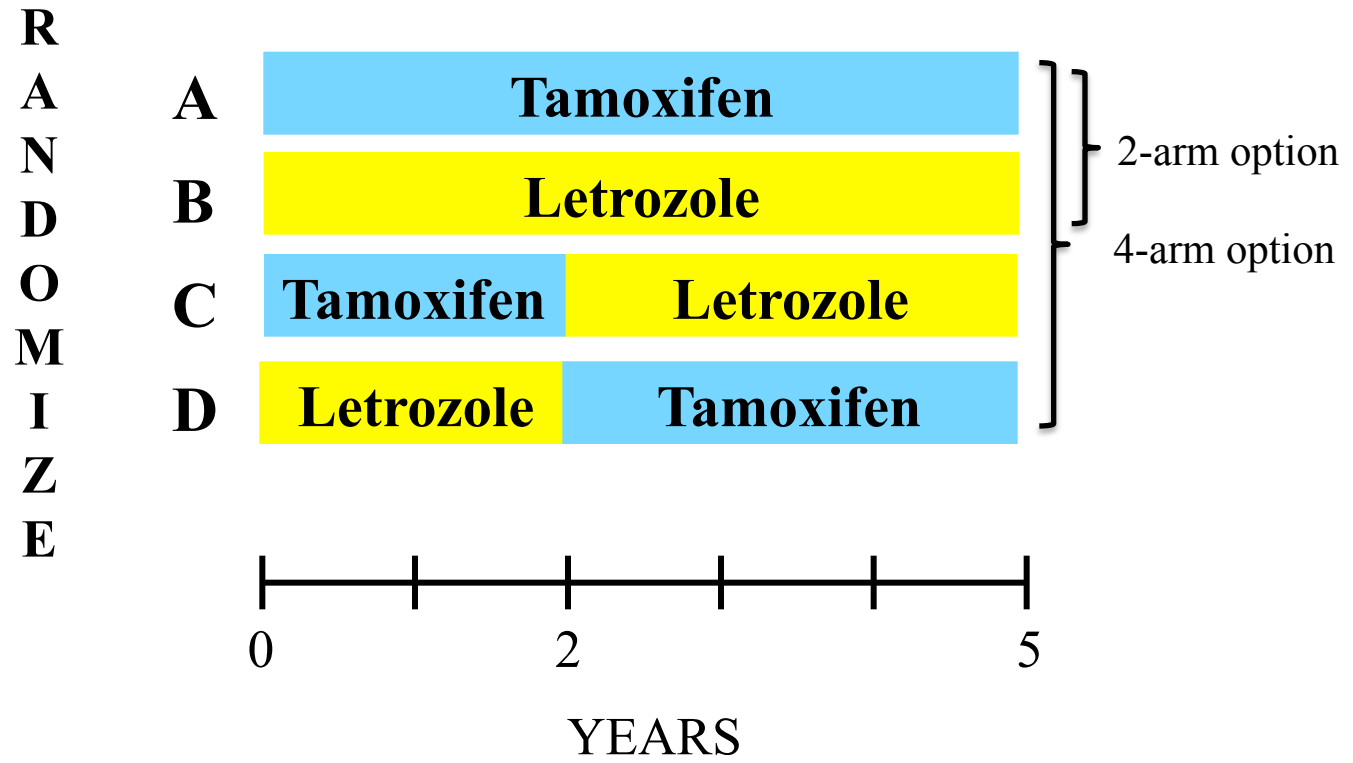

Supplement: MOESM2 [file 9704048]
